# Supplementary material for: Blood eosinophils and inhaled corticosteroid/long-acting β-2 agonist efficacy in COPD
Source: PubMed Central journal article supplement — Thorax. 2015 Nov 19;71(2):118–25. doi: 10.1136/thoraxjnl-2015-207021 (PMC4752631; doi:10.1136/thoraxjnl-2015-207021), 2015-11-19
Supplement: thoraxjnl-2015-207021-s1.pdf [file thoraxjnl-2015-207021-s1.pdf]

**Online Supplement**

**Table S1** Demographics and baseline characteristics for 24-week studies of FP/SAL in patients with COPD by baseline blood eosinophil level

| Treatment                                   | FP/SAL        |               | FP            |               | SAL           |               | Placebo       |               |
|---------------------------------------------|---------------|---------------|---------------|---------------|---------------|---------------|---------------|---------------|
|                                             | <2%           | ≥2%           | <2%           | ≥2%           | <2%           | ≥2%           | <2%           | ≥2%           |
| <b>SFCA3006</b>                             |               |               |               |               |               |               |               |               |
| N                                           | 87            | 76            | 80            | 87            | 76            | 84            | 86            | 94            |
| Age, mean years (SD)                        | 61.7 (9.52)   | 62.0 (9.10)   | 64.6 (9.50)   | 64.3 (9.19)   | 62.6 (8.74)   | 64.3 (10.03)  | 63.6 (8.10)   | 64.3 (8.56)   |
| Male (%)                                    | 56            | 68            | 56            | 66            | 57            | 71            | 77            | 73            |
| Current smokers (%)                         | 52            | 39            | 54            | 39            | 58            | 36            | 57            | 50            |
| Pack years, median (range)                  | 55.0 (15–150) | 54.5 (20–132) | 52.5 (23–120) | 54.0 (20–200) | 53.5 (20–193) | 50.0 (20–150) | 64.5 (20–165) | 60.0 (20–150) |
| FEV <sub>1</sub> % predicted, mean (SD)     | 47.1 (12.48)  | 50.8 (15.28)  | 47.7 (11.95)  | 49.9 (15.13)  | 48.9 (12.67)  | 47.6 (13.65)  | 49.2 (12.85)  | 48.8 (14.09)  |
| FEV <sub>1</sub> % reversibility, mean (SD) | 18.2 (14.56)  | 23.1 (18.44)  | 18.5 (14.33)  | 19.9 (13.67)  | 20.3 (14.02)  | 22.0 (18.26)  | 20.9 (14.65)  | 17.8 (13.69)  |
| <b>SFCA3007</b>                             |               |               |               |               |               |               |               |               |
| N                                           | 83            | 93            | 88            | 94            | 88            | 89            | 98            | 83            |
| Age, mean years (SD)                        | 61.2 (10.22)  | 65.5 (10.64)  | 62.6 (9.65)   | 63.9 (9.09)   | 63.2 (9.17)   | 65.2 (10.38)  | 64.6 (9.05)   | 64.9 (8.35)   |
| Male (%)                                    | 47            | 72            | 66            | 67            | 48            | 67            | 64            | 72            |
| Current smokers (%)                         | 48            | 39            | 59            | 38            | 60            | 42            | 53            | 41            |
| Pack years, median (range)                  | 60.0 (20–135) | 50.0 (20–220) | 60.0 (20–120) | 60.0 (20–162) | 58.0 (20–180) | 57.0 (20–224) | 60.0 (22–140) | 50.0 (20–165) |
| FEV <sub>1</sub> % predicted, mean (SD)     | 51.3 (13.33)  | 47.5 (12.49)  | 49.4 (12.68)  | 50.0 (13.60)  | 50.6 (12.68)* | 49.3 (12.82)  | 50.3 (13.98)  | 50.4 (14.69)  |
| FEV <sub>1</sub> % reversibility, mean (SD) | 19.8 (14.61)  | 20.7 (14.64)  | 19.0 (13.97)  | 20.2 (14.16)  | 21.5 (16.62)* | 21.1 (14.20)  | 18.6 (14.80)  | 22.0 (16.96)  |
| <b>SCO100470</b>                            |               |               |               |               |               |               |               |               |

|                                                         |              |               |   |   |              |               |   |   |
|---------------------------------------------------------|--------------|---------------|---|---|--------------|---------------|---|---|
| N                                                       | 175          | 332           | - | - | 184          | 329           | - | - |
| Age, mean years (SD)                                    | 62.7 (9.25)  | 64.0 (9.35)   | - | - | 62.9 (9.51)  | 64.0 (8.76)   | - | - |
| Male (%)                                                | 75           | 80            | - | - | 74           | 80            | - | - |
| Current smokers (%)                                     | 44           | 41‡           | - | - | 47           | 41            | - | - |
| Pack years, median (range)                              | 38.0 (6–125) | 35.0 (6–158)‡ | - | - | 36.0 (4–150) | 36.0 (10–135) | - | - |
| s                                                       | 63.5 (8.80)† | 63.3 (9.03)§  | - | - | 63.3 (8.40)¶ | 63.0 (9.15)** | - | - |
| FEV <sub>1</sub> % reversibility, mean (SD)             | 2.9 (3.98)†  | 2.9 (3.83)§   | - | - | 2.9 (4.07)¶  | 3.4 (4.24)**  | - | - |
| Moderate/severe exacerbations in prior 12 months, n (%) |              |               |   |   |              |               |   |   |
| 0                                                       | 104 (59)     | 191 (58)      |   |   | 114 (62)     | 181 (55)      |   |   |
| 1                                                       | 33 (19)      | 84 (25)       |   |   | 41 (22)      | 82 (25)       |   |   |
| 2                                                       | 22 (13)      | 30 (9)        |   |   | 20 (11)      | 42 (13)       |   |   |
| >2                                                      | 16 (9)       | 27 (8)        |   |   | 9 (5)        | 24 (7)        |   |   |

\*n=87.

†n=174.

‡n=332.

§n=328.

¶n=182.

||n=329.

\*\*n=327.

COPD, chronic obstructive pulmonary disease; FEV<sub>1</sub> = forced expiratory volume in 1 s; FP = fluticasone propionate; SAL = salmeterol; SD = standard deviation.

**Table S2** Summary of screening baseline blood eosinophil and white blood count data

| Treatment                               | FP/SAL            | FP                | SAL                | Tiotropium       | Placebo           |
|-----------------------------------------|-------------------|-------------------|--------------------|------------------|-------------------|
| TRISTAN (SFCB3024)                      |                   |                   |                    |                  |                   |
| N                                       | 341               | 360               | 355                | -                | 347               |
| Eosinophils, % (SD)                     | 3.62 (2.413)      | 3.42 (2.239)      | 3.75 (2.544)       | -                | 3.72 (2.353)      |
| Eosinophils, mm <sup>3</sup> (SD)       | 254.60 (200.803)  | 247.78 (182.597)  | 270.39 (206.370)   | -                | 265.68 (179.001)  |
| White blood cells, mm <sup>3</sup> (SD) | 7198.5 (1944.36)* | 7487.3 (2222.92)† | 7208.1 (1938.39)‡  | -                | 7321.8 (1902.26)§ |
| INSPIRE (SCO40036)                      |                   |                   |                    |                  |                   |
| N                                       | 634               | -                 | -                  | 635              | -                 |
| Eosinophils, % (SD)                     | 2.76 (2.281)      | -                 | -                  | 2.71 (2.219)     | -                 |
| Eosinophils, mm <sup>3</sup> (SD)       | 212.35 (178.598)  | -                 | -                  | 208.14 (175.812) | -                 |
| White blood cells, mm <sup>3</sup> (SD) | 8043.4 (2411.25)  | -                 | -                  | 8057.3 (2362.58) | -                 |
| SFCA3006                                |                   |                   |                    |                  |                   |
| N                                       | 163               | 167               | 160                | -                | 180               |
| Eosinophils, % (SD)                     | 2.55 (2.433)      | 2.44 (1.788)      | 2.49 (1.811)       | -                | 2.53 (1.808)      |
| Eosinophils, mm <sup>3</sup> (SD)       | 189.38 (233.670)  | 170.82 (139.242)  | 175.03 (130.927)   | -                | 181.87 (139.170)  |
| White blood cells, mm <sup>3</sup> (SD) | 7401.0 (1995.95)  | 6954.7 (1825.09)  | 7278.4 (1898.01)   | -                | 7304.6 (2150.20)  |
| SFCA3007                                |                   |                   |                    |                  |                   |
| N                                       | 176               | 182               | 177                | -                | 181               |
| Eosinophils, % (SD)                     | 2.46 (1.657)      | 2.43 (1.735)      | 2.50 (1.950)       | -                | 2.30 (1.685)      |
| Eosinophils, mm <sup>3</sup> (SD)       | 172.37 (121.182)  | 178.75 (130.499)  | 187.31 (161.910)   | -                | 167.17 (124.027)  |
| White blood cells, mm <sup>3</sup> (SD) | 7277.6 (1806.43)  | 7537.1 (2079.11)  | 7560.6 (1967.03)   | -                | 7415.2 (1901.96)  |
| SCO100470                               |                   |                   |                    |                  |                   |
| N                                       | 507               | -                 | 513                | -                | -                 |
| Eosinophils, % (SD)                     | 3.18 (2.851)      | -                 | 3.37 (3.154)       | -                | -                 |
| Eosinophils, mm <sup>3</sup> (SD)       | 238.78 (249.783)  | -                 | 250.22 (305.034)¶  | -                | -                 |
| White blood cells, mm <sup>3</sup> (SD) | 7541.8 (1910.65)  | -                 | 7563.7 (2317.14)¶¶ | -                | -                 |

\*n=344.

†n=361.

‡n=356.

§n=348.

¶n=511.

||n=512.

FP, fluticasone propionate; SAL, salmeterol; SD, standard deviation.

**Table S3** Adjusted mean number of exacerbations/year according to study treatment and baseline blood eosinophil subgroup

| Treatment                                 | FP/SAL |      | FP   |      | SAL  |      | Tiotropium |      | Placebo |      |
|-------------------------------------------|--------|------|------|------|------|------|------------|------|---------|------|
|                                           | <2%    | ≥2%  | <2%  | ≥2%  | <2%  | ≥2%  | <2%        | ≥2%  | <2%     | ≥2%  |
| TRISTAN (SFCB3024)                        |        |      |      |      |      |      |            |      |         |      |
| n                                         | 92     | 247  | 94   | 266  | 86   | 269  | -          | -    | 81      | 266  |
| Adjusted mean                             | 1.43   | 1.14 | 1.18 | 1.32 | 1.23 | 1.28 | -          | -    | 1.44    | 1.82 |
| INSPIRE (SCO40036)                        |        |      |      |      |      |      |            |      |         |      |
| <i>Excluding history of exacerbations</i> |        |      |      |      |      |      |            |      |         |      |
| n                                         | 263    | 371  | -    | -    | -    | -    | 287        | 348  | -       | -    |
| Adjusted mean                             | 1.57   | 1.60 | -    | -    | -    | -    | 1.32       | 2.14 | -       | -    |
| <i>Including history of exacerbations</i> |        |      |      |      |      |      |            |      |         |      |
| n                                         | 263    | 371  | -    | -    | -    | -    | 287        | 348  | -       | -    |
| Adjusted mean                             | 1.34   | 1.47 | -    | -    | -    | -    | 1.25       | 1.79 | -       | -    |
| SCO30002                                  |        |      |      |      |      |      |            |      |         |      |
| <i>Excluding history of exacerbations</i> |        |      |      |      |      |      |            |      |         |      |
| n                                         | 45     | 84   | 50   | 74   | -    | -    | -          | -    | 50      | 70   |
| Adjusted mean                             | 1.77   | 0.89 | 1.16 | 0.87 | -    | -    | -          | -    | 0.94    | 1.08 |
| <i>Including history of exacerbations</i> |        |      |      |      |      |      |            |      |         |      |
| n                                         | 45     | 83   | 50   | 74   | -    | -    | -          | -    | 50      | 70   |
| Adjusted mean                             | 1.68   | 0.84 | 1.06 | 0.81 | -    | -    | -          | -    | 0.88    | 1.02 |

FP, fluticasone propionate; SAL, salmeterol.

Analysis performed using a negative binomial regression model with covariates of either: treatment, gender, history of exacerbations, baseline % predicted FEV<sub>1</sub>, percentage eosinophil group and treatment by percentage eosinophils interaction; or treatment, gender, baseline % predicted FEV<sub>1</sub>, percentage eosinophil group and treatment by percentage eosinophils interaction.

**Table S4** Analysis of moderate and severe exacerbations negative binomial model by treatment and percentage eosinophils using a 3% cut-off in INSPIRE and TRISTAN

| Treatment comparison                                                    | Eosinophil level <3%  |         | Eosinophil level ≥3%  |                  |
|-------------------------------------------------------------------------|-----------------------|---------|-----------------------|------------------|
|                                                                         | Hazard ratio (95% CI) | p-value | Hazard ratio (95% CI) | p-value          |
| <b>INSPIRE (SCO40036) (n=1,269)</b>                                     |                       |         |                       |                  |
| FP/SAL versus tiotropium (excluding history of exacerbations covariate) | 0.94 (0.77, 1.15)     | 0.542   | 0.83 (0.63, 1.09)     | 0.177            |
| FP/SAL versus tiotropium (including history of exacerbations covariate) | 0.91 (0.75, 1.10)     | 0.330   | 0.93 (0.71, 1.22)     | 0.614            |
| <b>TRISTAN (SFCB3024) (n=1,403)</b>                                     |                       |         |                       |                  |
| FP/SAL versus placebo                                                   | 0.91 (0.68, 1.22)     | 0.517   | 0.56 (0.43, 0.75)     | <b>&lt;0.001</b> |
| FP/SAL versus SAL                                                       | 1.09 (0.82, 1.45)     | 0.554   | 0.85 (0.64, 1.12)     | 0.241            |
| FP/SAL versus FP                                                        | 0.97 (0.74, 1.29)     | 0.854   | 0.92 (0.69, 1.21)     | 0.550            |
| FP versus placebo                                                       | 0.93 (0.70, 1.24)     | 0.629   | 0.61 (0.47, 0.80)     | <b>&lt;0.001</b> |
| SAL versus placebo                                                      | 0.83 (0.62, 1.11)     | 0.217   | 0.67 (0.51, 0.87)     | <b>0.003</b>     |

FP, fluticasone propionate; SAL, salmeterol.

Analysis performed using a negative binomial regression model with covariates of either: treatment, gender, history of exacerbations, baseline % predicted FEV<sub>1</sub>, percentage eosinophil group and treatment by percentage eosinophils interaction; or treatment, gender, baseline % predicted FEV<sub>1</sub>, percentage eosinophil group and treatment by percentage eosinophils interaction.

**Table S5** An analysis of the rate of exacerbations requiring antibiotics

| Treatment comparison                                                    | Eosinophil level <2%  |              | Eosinophil level ≥2%  |         |
|-------------------------------------------------------------------------|-----------------------|--------------|-----------------------|---------|
|                                                                         | Hazard ratio (95% CI) | p-value      | Hazard ratio (95% CI) | p-value |
| <b>INSPIRE (SCO40036) (n=1,269)</b>                                     |                       |              |                       |         |
| FP/SAL versus tiotropium (excluding history of exacerbations covariate) | 1.46 (1.13, 1.89)     | <b>0.004</b> | 0.95 (0.76, 1.19)     | 0.652   |
| FP/SAL versus tiotropium (including history of exacerbations covariate) | 1.32 (1.03, 1.70)     | <b>0.030</b> | 1.05 (0.84, 1.30)     | 0.670   |
| <b>TRISTAN (SFCB3024) (n=1,403)</b>                                     |                       |              |                       |         |
| FP/SAL versus placebo                                                   | 1.43 (0.92, 2.24)     | 0.115        | 0.93 (0.72, 1.22)     | 0.615   |
| FP/SAL versus SAL                                                       | 1.63 (1.05, 2.53)     | <b>0.028</b> | 1.14 (0.88, 1.48)     | 0.324   |
| FP/SAL versus FP                                                        | 1.44 (0.95, 2.19)     | 0.086        | 0.93 (0.72, 1.19)     | 0.567   |
| FP versus placebo                                                       | 0.99 (0.63, 1.56)     | 0.979        | 1.01 (0.78, 1.30)     | 0.964   |
| SAL versus placebo                                                      | 0.88 (0.55, 1.40)     | 0.586        | 0.82 (0.63, 1.07)     | 0.143   |

Analysis performed using a negative binomial regression model with covariates of either: treatment, gender, history of exacerbations, baseline % predicted FEV<sub>1</sub>, percentage eosinophil group and treatment by percentage eosinophils interaction; or treatment, gender, baseline % predicted FEV<sub>1</sub>, percentage eosinophil group and treatment by percentage eosinophils interaction.

FP, fluticasone propionate; SAL, salmeterol.



**Table S6** An analysis of the rate of exacerbations requiring oral corticosteroids

| Treatment comparison                                                    | Eosinophil level <2%  |         | Eosinophil level ≥2%  |                  |
|-------------------------------------------------------------------------|-----------------------|---------|-----------------------|------------------|
|                                                                         | Hazard ratio (95% CI) | p-value | Hazard ratio (95% CI) | p-value          |
| <b>INSPIRE (SCO40036) (n=1,269)</b>                                     |                       |         |                       |                  |
| FP/SAL versus tiotropium (excluding history of exacerbations covariate) | 1.08 (0.79, 1.51)     | 0.633   | 0.53 (0.40, 0.70)     | <b>&lt;0.001</b> |
| FP/SAL versus tiotropium (including history of exacerbations covariate) | 0.99 (0.72, 1.38)     | 0.974   | 0.58 (0.44, 0.76)     | <b>&lt;0.001</b> |
| <b>TRISTAN (SFCB3024) (n=1,403)</b>                                     |                       |         |                       |                  |
| FP/SAL versus placebo                                                   | 0.74 (0.43, 1.27)     | 0.274   | 0.50 (0.36, 0.69)     | <b>&lt;0.001</b> |
| FP/SAL versus SAL                                                       | 1.02 (0.60, 1.74)     | 0.932   | 0.82 (0.59, 1.13)     | 0.219            |
| FP/SAL versus FP                                                        | 1.08 (0.64, 1.83)     | 0.775   | 0.93 (0.67, 1.28)     | 0.658            |
| FP versus placebo                                                       | 0.69 (0.41, 1.15)     | 0.154   | 0.54 (0.39, 0.73)     | <b>&lt;0.001</b> |
| SAL versus placebo                                                      | 0.72 (0.43, 1.22)     | 0.224   | 0.61 (0.45, 0.82)     | <b>0.001</b>     |

Analysis performed using a negative binomial regression model with covariates of either: treatment, gender, history of exacerbations, baseline % predicted FEV<sub>1</sub>, percentage eosinophil group and treatment by percentage eosinophils interaction; or treatment, gender, baseline % predicted FEV<sub>1</sub>, percentage eosinophil group and treatment by percentage eosinophils interaction.

FP, fluticasone propionate; SAL, salmeterol.

**Figure S1** Proportion of all patients with baseline blood eosinophil level  $<2\%$  and  $\geq 2\%$  in 24-week studies of FP/SAL in patients with COPD.

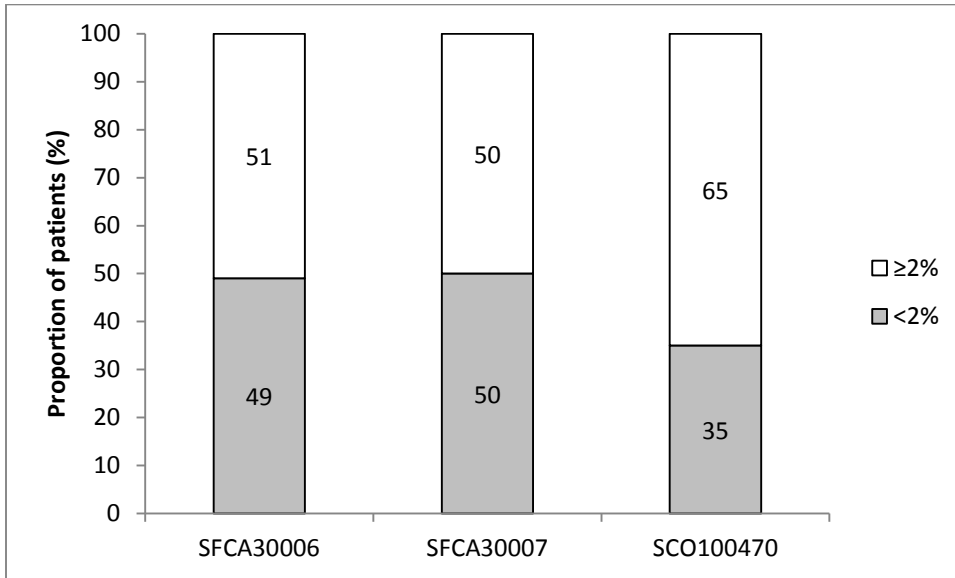

COPD, chronic obstructive pulmonary disease; FP, fluticasone propionate; SAL, salmeterol.

**Figure S2** Scatter plot of (A) 24-week post-baseline blood eosinophils versus baseline blood eosinophils, (B) 52-week post-baseline blood eosinophils versus baseline blood eosinophils, and (C) 24-week post-baseline blood eosinophils versus 52-week post-baseline blood eosinophils, in the placebo group of TRISTAN (SFCB3024).

A

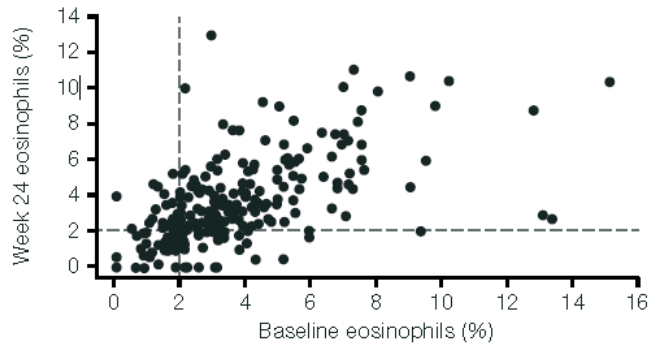

B

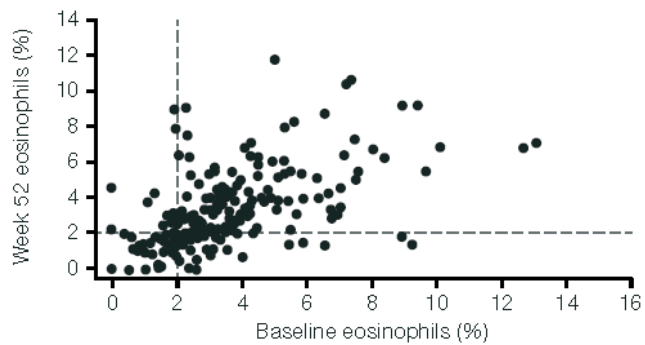

C

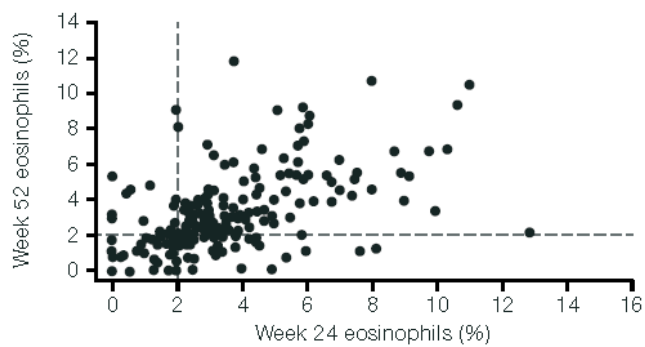

Dashed line represents 2% eosinophils.

**Figure S3** Analysis of time to first moderate/severe exacerbation with FP/SAL and monocomponents for treatment comparisons of interest in  $\geq 1$ -year studies by baseline blood eosinophil level in (A) INSPIRE (B) TRISTAN and (C) SCO30002

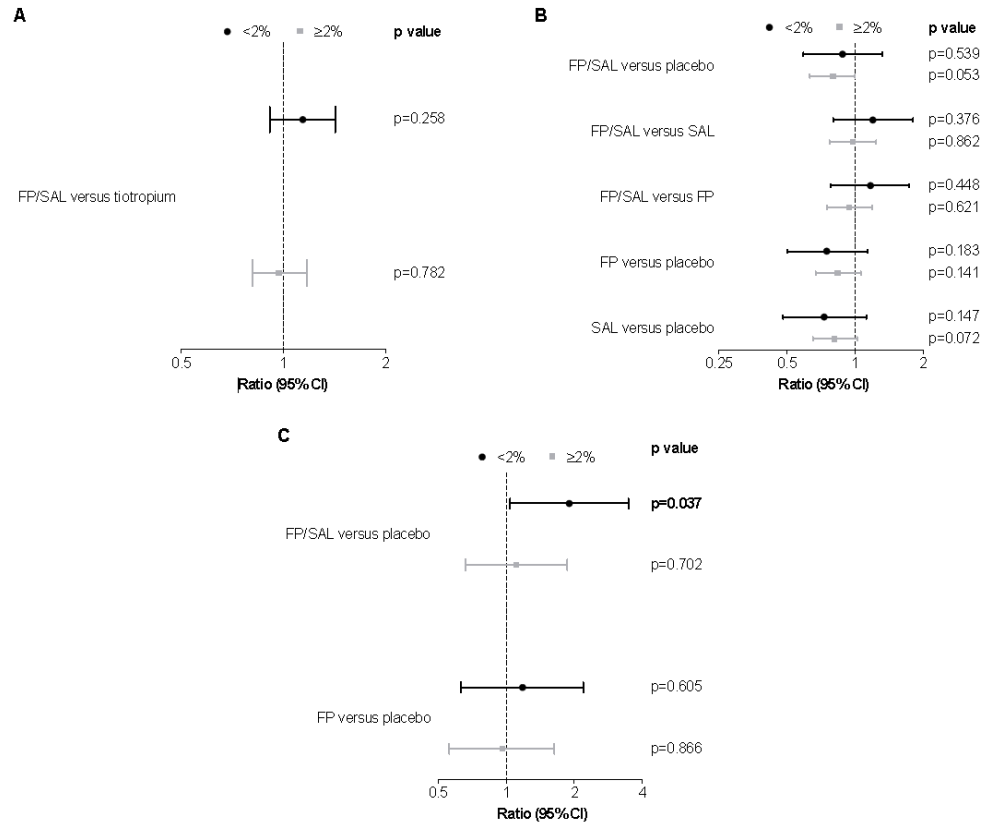

Analysis performed using a Cox's proportional hazards model with covariates of: treatment, gender, history of exacerbations (INSPIRE and SCO30002 only), baseline % predicted FEV<sub>1</sub>, percentage eosinophil group and treatment by percentage eosinophils interaction

<1 favours first-named treatment; >1 favours second-named treatment or placebo. CI, confidence interval; FP, fluticasone propionate; SAL, salmeterol. *Note:* Statistically significant comparisons (p<0.05) shown in bold font.

**Figure S4** Time to first moderate/severe exacerbation by treatment comparison and baseline blood eosinophil subgroup in 24-week studies of FP/SAL in patients with COPD, for selected treatment comparisons.

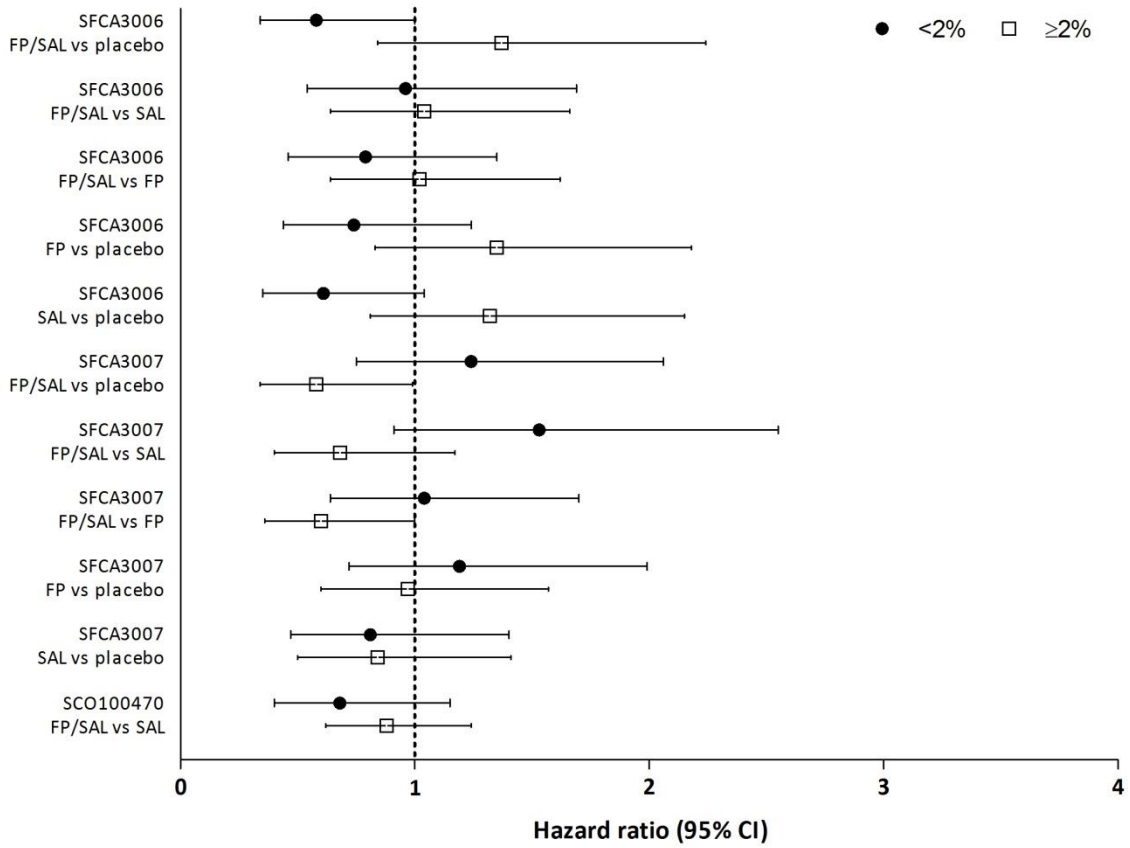

<1 favours first-named treatment; >1 favours second-named treatment or placebo. CI, confidence interval; COPD, chronic obstructive pulmonary disease; FP, fluticasone propionate; SAL, salmeterol.

**Figure S5** Time to first moderate/severe exacerbation with FP/SAL versus tiotropium, FP, SAL, or placebo by baseline blood eosinophil absolute count in (A) INSPIRE (B) TRISTAN and (C) SCO30002

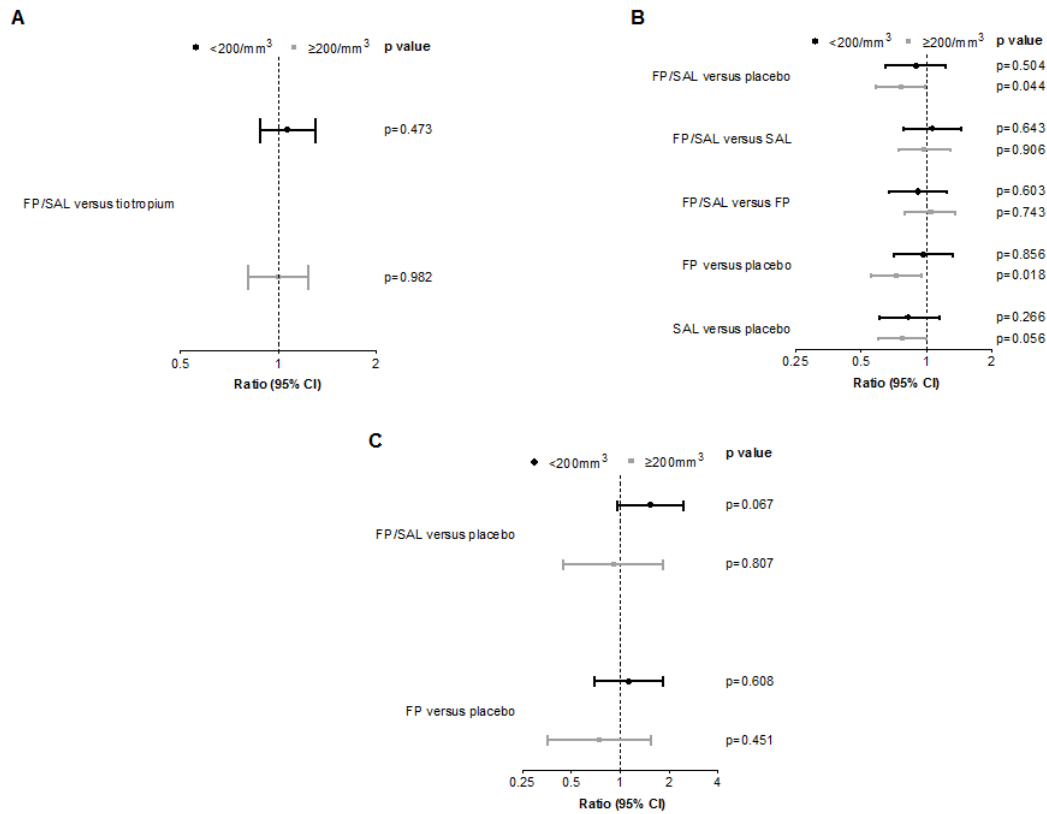

Analysis performed using a Cox's proportional hazards model with covariates of either: treatment, gender, history of exacerbations, baseline % predicted FEV<sub>1</sub>, percentage eosinophil group and treatment by percentage eosinophils interaction; or treatment, gender, baseline % predicted FEV<sub>1</sub>, percentage eosinophil group and treatment by percentage eosinophils interaction.

**Figure S6** Weighted mean (95% CI) FEV<sub>1</sub> by treatment comparison and baseline blood eosinophil subgroup in ≥1-year studies of FP/SAL in patients with COPD (selected treatment comparisons).

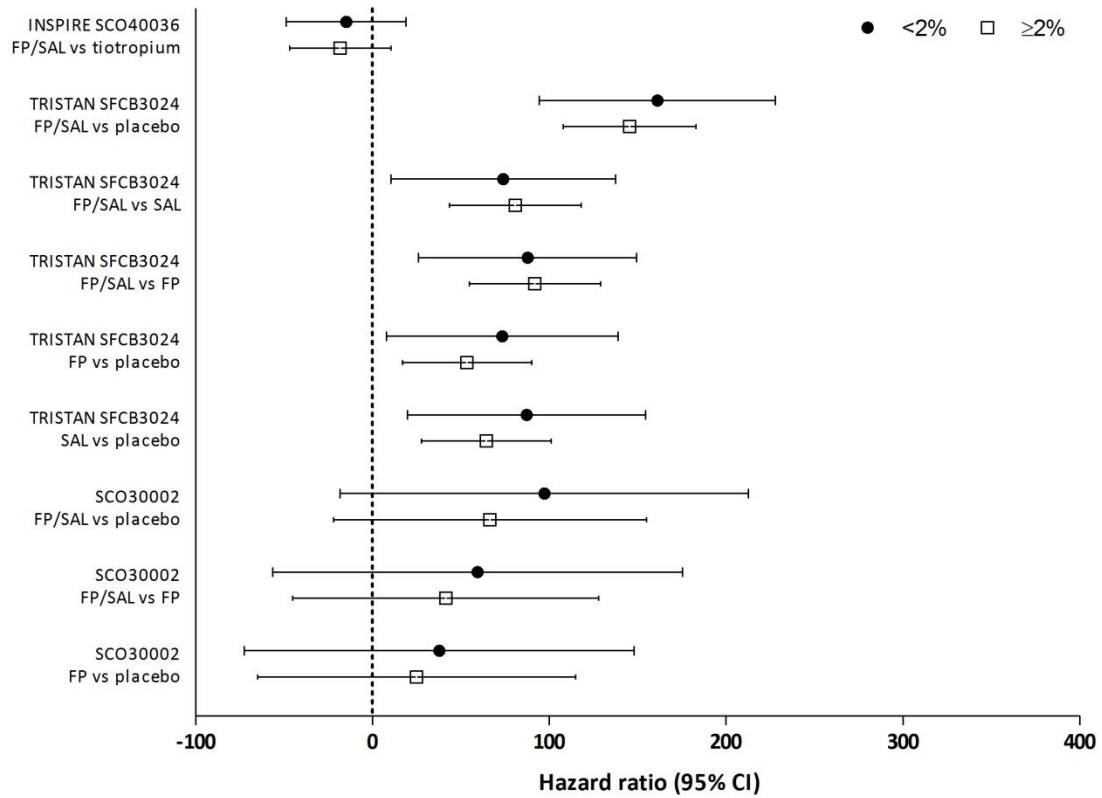

>0 favours first-named treatment; <0 favours second-named treatment or placebo. CI, confidence interval; COPD, chronic obstructive pulmonary disease; FEV<sub>1</sub>, forced expiratory volume in 1 s; FP, fluticasone propionate; SAL, salmeterol. *Note:* Weighted means were measured as follows: SCO40036, week 2–104 trough FEV<sub>1</sub>; SFCB3024, week 2–52 pre-bronchodilator FEV<sub>1</sub>; SCO30002, visit 4–9 pre-bronchodilator FEV<sub>1</sub> (24–>52 weeks).

**Figure S7** Weighted mean (95% CI) FEV<sub>1</sub> by treatment comparison and baseline blood eosinophil subgroup in 24-week studies of FP/SAL in patients with COPD, for selected treatment comparisons.

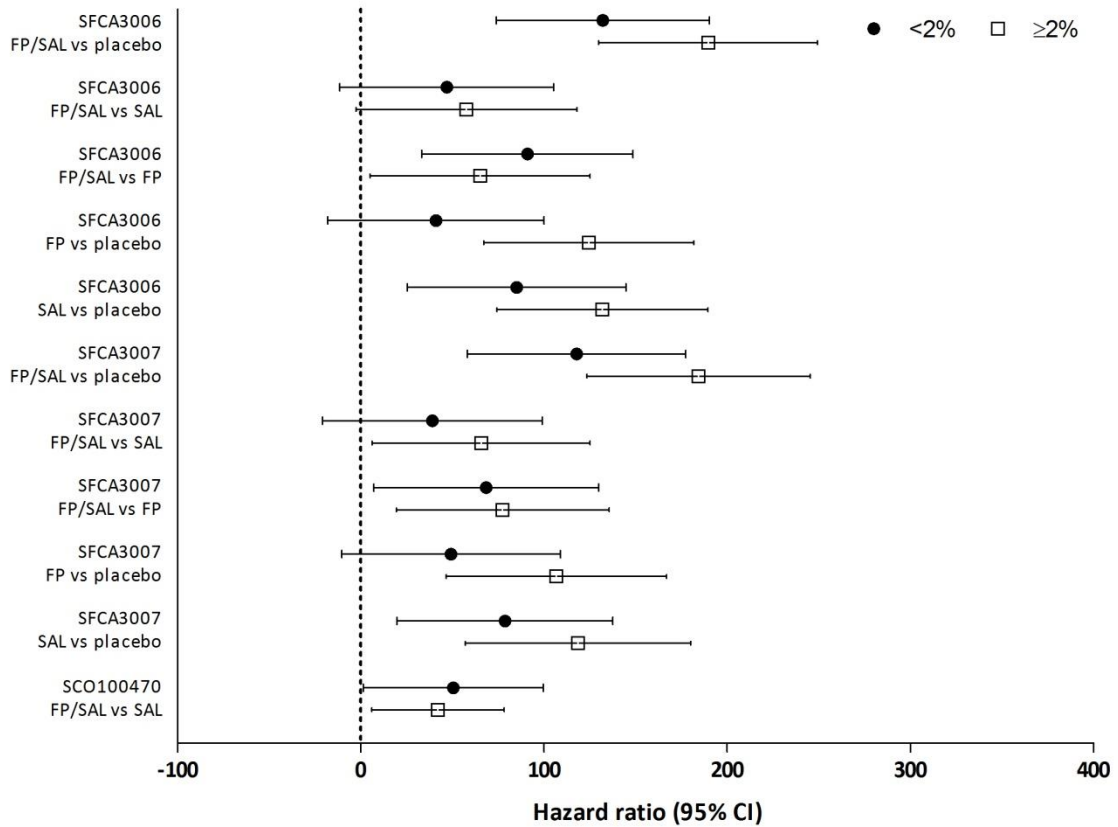

>0 favours first-named treatment; <0 favours second-named treatment or placebo. CI, confidence interval; COPD, chronic obstructive pulmonary disease; FEV<sub>1</sub>, forced expiratory volume in 1 s; FP, fluticasone propionate; SAL, salmeterol. *Note:* Weighted means were measured as follows: SFCA3006, Week 1–24 pre-dose FEV<sub>1</sub>; SFCA3007, Week 1–24 pre-dose FEV<sub>1</sub>; SCO100470, Week 4–24 trough FEV<sub>1</sub>.



**Figure S8** Response to treatment on SGRQ score at study end by treatment comparison and baseline blood eosinophil subgroup in studies of FP/SAL in patients with COPD in which this endpoint was recorded (selected treatment comparisons).

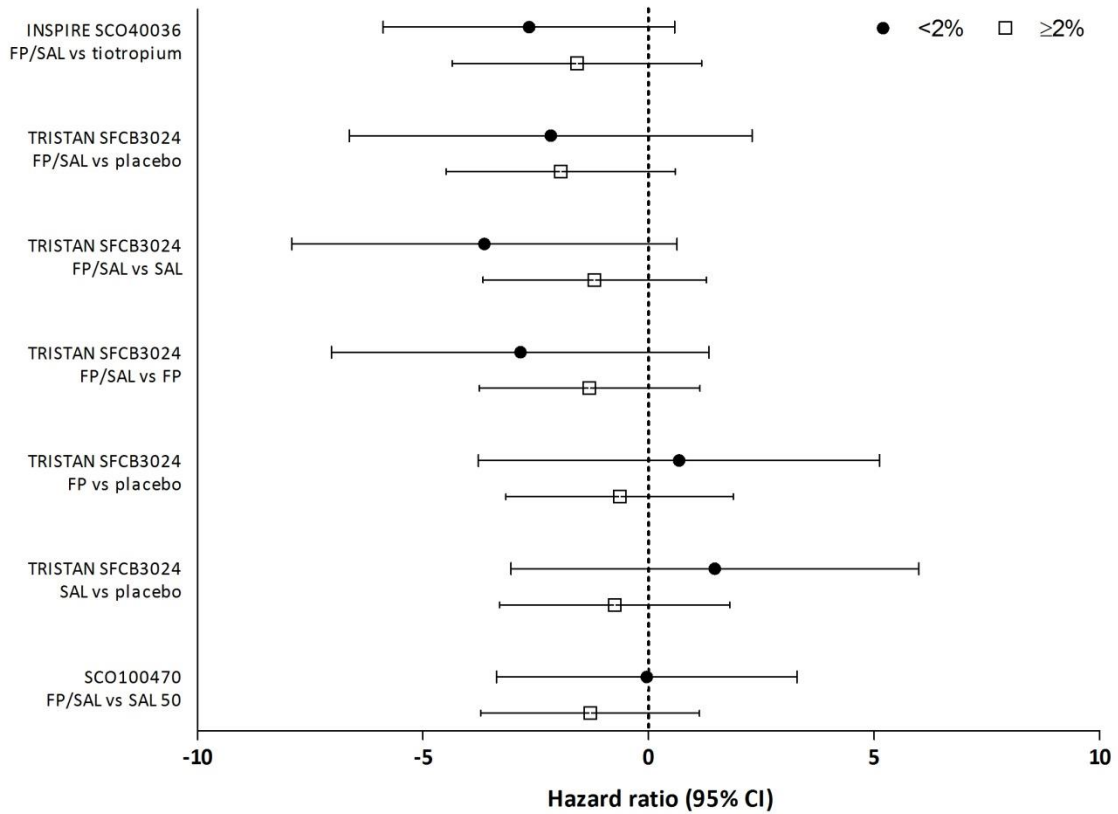

>0 favours first-named treatment; <0 favours second-named treatment or placebo. CI, confidence interval; COPD, chronic obstructive pulmonary disease; FP, fluticasone propionate; SAL, salmeterol; SGRQ, St George's Respiratory Questionnaire.

**Figure S9** Scatter plot of % bronchodilator reversibility and % eosinophil level for (A) TRISTAN and (B) INSPIRE

A

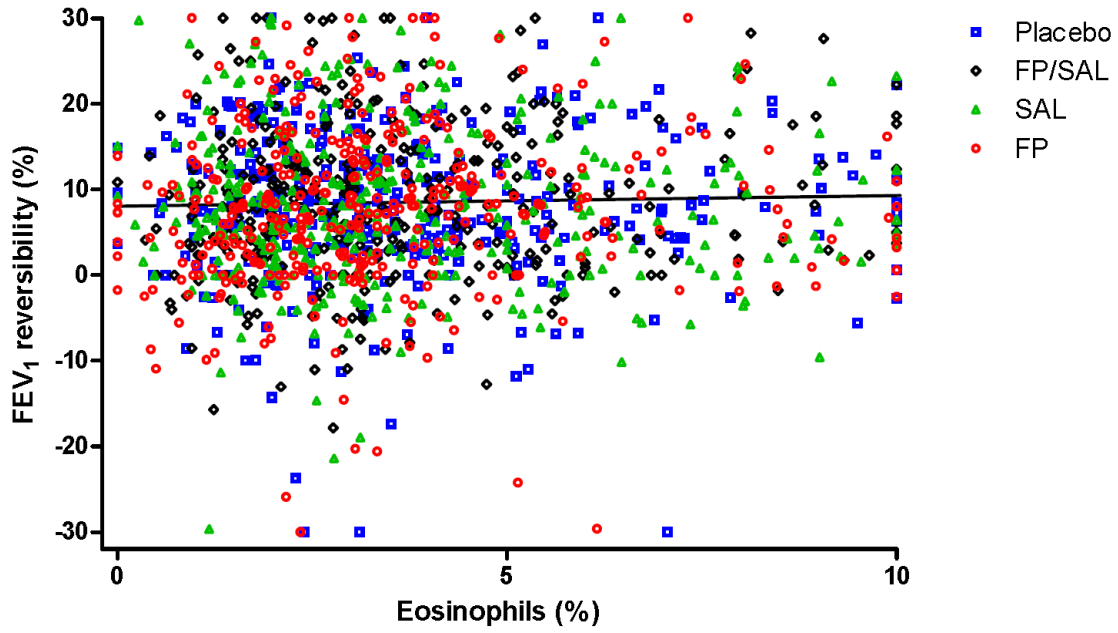

B

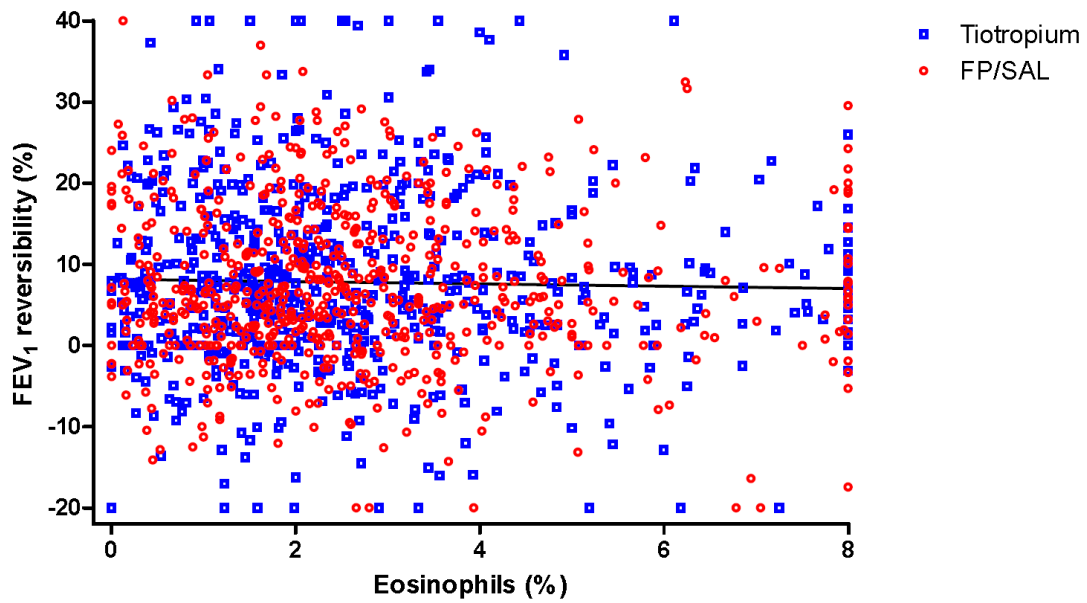

**Figure S10** Association between baseline blood eosinophil subgroup and pneumonia by study.

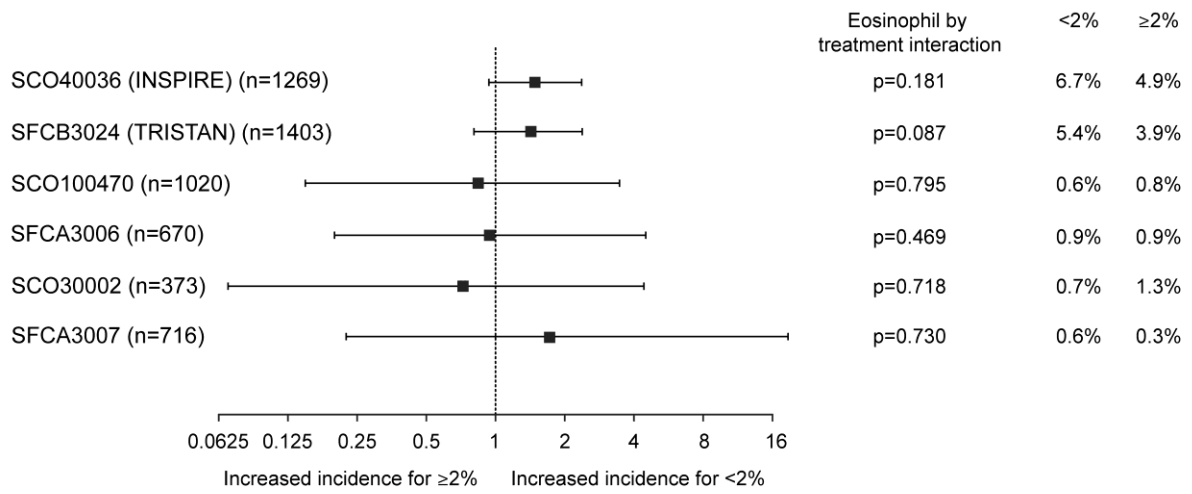

Note: in this analysis treatments were defined as inhaled corticosteroid containing or non-corticosteroid containing.

**Statistical Analysis Plan (Online Supplement)**

**Division:** Worldwide Development  
**Retention Category:** GRS019  
**Information Type:** Summary Document Analysis Plan

|               |                                                                                                                                                                                                                           |
|---------------|---------------------------------------------------------------------------------------------------------------------------------------------------------------------------------------------------------------------------|
| <b>Title:</b> | Summary Document Analysis Plan for analysis of exacerbations, FEV <sub>1</sub> and SGRQ in Fluticasone Propionate (CI18781) and Salmeterol/Fluticasone Propionate Combination Studies (CCI18781+GR33343) in COPD subjects |
|---------------|---------------------------------------------------------------------------------------------------------------------------------------------------------------------------------------------------------------------------|

**Compound Number:** CCI18781+GR33343

**Effective Date:**

Description: The document describes details of analyses of exacerbations and FEV<sub>1</sub> event reports in GSK studies conducted with Fluticasone Propionate (FP) or Salmeterol/Fluticasone Propionate (SFC) for COPD. Analyses will be conducted for each identified study separately.

**Subject:** salmeterol, fluticasone propionate

**Author:** Lettis, Sally

---

Sally Lettis  
Director Clinical Statistics

---

**Date** 21-NOV-2012

Approved by: E-mail approval obtained

---

Neil Barnes  
Global Franchise Medical Head, Respiratory

---

**Date**

•

08 –November 2013

---

David Stempel  
Global Medical Lead, Respiratory

---

**Date**

Copyright 2012 the GlaxoSmithKline group of companies. All rights reserved.  
Unauthorised copying or use of this information is prohibited

## TABLE OF CONTENTS

|                                                                      | PAGE                                |
|----------------------------------------------------------------------|-------------------------------------|
| ABBREVIATIONS .....                                                  | 24                                  |
| 1. INTRODUCTION .....                                                | 25                                  |
| 2. OBJECTIVE(S) .....                                                | 25                                  |
| 3. STUDIES TO BE INCLUDED.....                                       | 25                                  |
| 3.1. Criteria for Study Selection .....                              | 25                                  |
| 3.2. Studies Selected.....                                           | 26                                  |
| 3.2.1. COPD.....                                                     | <b>Error! Bookmark not defined.</b> |
| 3.2.2. Asthma .....                                                  | <b>Error! Bookmark not defined.</b> |
| 4. PLANNED ANALYSES .....                                            | 28                                  |
| 4.1. Meta-analyses .....                                             | 28                                  |
| 5. ANALYSIS POPULATIONS .....                                        | 28                                  |
| 6. TREATMENT COMPARISONS.....                                        | 28                                  |
| 6.1. Data Display Treatment Descriptors .....                        | 28                                  |
| 6.1.1. COPD.....                                                     | <b>Error! Bookmark not defined.</b> |
| 7. GENERAL CONSIDERATIONS FOR DATA ANALYSES.....                     | 29                                  |
| 7.1. Data Handling Conventions .....                                 | <b>Error! Bookmark not defined.</b> |
| 7.1.1. Rate of Moderate and Severe Exacerbations .....               | 29                                  |
| 7.1.2. Rate of decline in FEV <sub>1</sub> .....                     | <b>Error! Bookmark not defined.</b> |
| 8. EFFICACY ANALYSES .....                                           | 30                                  |
| 8.1. Rate of Moderate and Severe Exacerbations .....                 | 30                                  |
| 8.2. FEV <sub>1</sub> .....                                          | <b>Error! Bookmark not defined.</b> |
| 8.3. Rate of decline in FEV <sub>1</sub> .....                       | <b>Error! Bookmark not defined.</b> |
| 9. REFERENCES .....                                                  | 33                                  |
| ATTACHMENTS .....                                                    | <b>ERROR! BOOKMARK NOT DEFINED.</b> |
| Attachment 1: Table of Contents for Data Display Specifications..... | <b>Error! Bookmark not defined.</b> |

## **ABBREVIATIONS**

|      |                                               |
|------|-----------------------------------------------|
| BD   | Twice daily                                   |
| COPD | Chronic obstructive pulmonary disease         |
| FF   | Fluticasone Furoate                           |
| FP   | Fluticasone Propionate                        |
| GSK  | GlaxoSmithKline                               |
| ICS  | Inhaled Corticosteroid                        |
| OD   | Once daily                                    |
| Salm | Salmeterol                                    |
| SFC  | Salmeterol/Fluticasone Propionate Combination |
| VI   | Vilanterol                                    |

## **Trademark Information**

| <b>Trademarks of the GlaxoSmithKline group of companies</b> |
|-------------------------------------------------------------|
| Seretide                                                    |
| Advair                                                      |
|                                                             |

| <b>Trademarks not owned by the GlaxoSmithKline group of companies</b> |
|-----------------------------------------------------------------------|
|                                                                       |
|                                                                       |
|                                                                       |



## **INTRODUCTION**

Exploratory analyses performed for the rate of moderate and severe exacerbations from the two fluticasone furoate/vilanterol exacerbation studies HZC102871 and HZC102970 suggest that subjects with increased blood eosinophils at baseline ( $>2\%$ ) experience a higher annual rate of moderate and severe exacerbations than those without ( $\leq 2\%$ ). Furthermore, larger reductions in the rate of exacerbations were observed for fluticasone furoate/vilanterol compared with vilanterol alone in the group with blood eosinophils  $>2\%$  at baseline than in the overall population.

This finding is further supported by published literature. For example, in a large longitudinal cohort study in the general adult population, Jansen et al showed that cigarette smoking and hyperresponsiveness are associated with an increased risk of developing respiratory symptoms, and especially so when eosinophilia is present (Jansen et al). Petsky et al also demonstrated that asthma patients with sputum eosinophilia were at increased risk of exacerbations (Petsky et al).

The purpose of the analyses described in this analysis plan is to test these hypotheses using data from SFC and FP COPD studies.

The results of the exploratory analyses examining the relationship between blood eosinophilia and the rate of exacerbations in FF/VI studies HZC102871 and HZC102970 will be included in the clinical report of the analyses described in this analysis plan.

## **OBJECTIVE(S)**

The objectives are:

- To evaluate if blood eosinophilia is associated with increased rate of moderate and severe exacerbations (use of antibiotics, OCS or hospitalization for COPD), increased risk of time to first moderate or severe exacerbation, increased rate of FEV<sub>1</sub> decline, decreased HRQoL as measured by SGRQ and decreased lung function as measured by trough FEV<sub>1</sub>
- To evaluate if treatment with an ICS (FP) reduces the rate of moderate and severe exacerbations, reduces the risk of time to first moderate or severe exacerbation, reduces the rate of FEV<sub>1</sub> decline, improves HRQoL (as measured by SGRQ) and/or increases trough FEV<sub>1</sub> to a greater extent in those with blood eosinophilia than those without.

## **STUDIES TO BE INCLUDED**

### **Criteria for Study Selection**

The following criteria will be used to select studies:

- Clinical trials that include any FP or SFC for COPD worldwide as a randomized study drug not in combination with another study drug

Randomised, parallel-group, double-blind

- At least 24 weeks duration
- Constant study dose of SFC
- In addition to SFC or FP, inclusion of a non-steroid containing treatment arm
- Blood samples for eosinophils at baseline or screening

Only data collected during the double-blind treatment period will be used.

### **1.1. Studies Selected**

FP and SFC COPD studies of at least 24 weeks duration and which included a non-steroid containing arm were reviewed for inclusion in this analysis; these are listed in Table 1. The reason for excluding any of these studies from the analysis is also documented in this table. A list of FP and SFC COPD studies reviewed but excluded for any of the other reasons listed in Section 3.1 is provided in Appendix 1.

**Table 1 SFC and FP COPD Studies of at least 24 weeks duration and which included a non-steroid containing arm**

| <b>Study</b>       | <b>SFC Dose<br/>Or FP Dose</b> | <b>Comparators</b>      | <b>Duration</b> | <b>Reason for<br/>Exclusion</b> |
|--------------------|--------------------------------|-------------------------|-----------------|---------------------------------|
| SCO30003 (TORCH)   | 50/500                         | Placebo, Salmeterol, FP | 156 weeks       | No eosinophil data              |
| SCO40036 (INSPIRE) | 50/500                         | Tiotropium              | 104 weeks       |                                 |
| SFCB3024 (TRISTAN) | 50/500                         | Placebo, Salmeterol, FP | 52 weeks        |                                 |
| SCO40002 (COSMIC)  | 50/500                         | Salmeterol              | 52 weeks        | No eosinophil data              |
| SCO30002           | 50/500 (MDI)                   | Placebo, FP             | 52 weeks        |                                 |
| SCO30006 (VIVACE)  | 50/500                         | Salmeterol              | 44 weeks        | No eosinophil data              |
| SFCA3006           | 50/500                         | Placebo, Salmeterol, FP | 24 weeks        |                                 |
| SCO100540          | 50/500                         | Placebo                 | 24 weeks        |                                 |
| SFCA3007           | 50/250                         | Placebo, Salmeterol, FP | 24 weeks        |                                 |
| SCO100470          | 50/250                         | Salmeterol              | 24 weeks        |                                 |
| SCO100250          | 50/250                         | Salmeterol              | 52 weeks        | No eosinophil data              |
| SCO40041           | 50/250                         | Salmeterol              | 104 weeks       | No eosinophil data              |
| SCO40043           | 50/250                         | Salmeterol              | 52 weeks        | No eosinophil data              |
| ADC113874          | 50/250                         | Salmeterol              | 29 weeks        | No eosinophil data              |
| FLIT78 (ISOLDE)    | 500                            | Placebo                 | 3 years         |                                 |
| FLTA3025           | 250, 500                       | Placebo                 | 24 weeks        |                                 |
| FLIT97             | 500                            | Placebo                 | 24 weeks        |                                 |

## PLANNED ANALYSES

### Meta-analyses

This summary document analysis plan describes analyses for each study separately.

No formal meta-analysis will be conducted.

## ANALYSIS POPULATIONS

The analysis population for this analysis will comprise the primary analysis population used within each individual study report.

## TREATMENT COMPARISONS

### Primary Comparisons of Interest: Eosinophil Levels

Blood eosinophil categories are defined in Section 8.1.1. For each definition, one category will be defined as the reference group and comparisons made between each other category and the reference category.

### Primary Comparisons of Interest: Treatment Differences

The treatment comparisons of interest will be of ICS vs non-steroid containing arms within each individual study, as appropriate. Specifically:

- SFC vs SAL alone
- SFC vs Tiotropium
- SFC vs placebo
- FP vs placebo

### 1.2. Data Display Treatment Descriptors

All table headers and treatment formats will use the convention described in Table 2.

**Table 2 Table Headers and Treatment Formats**

| Table Header | Treatment description |
|--------------|-----------------------|
| Placebo      | Placebo               |
| SFC 50/250   | SFC 50/250 BD         |
| SFC 50/500   | SFC 50/500 BD         |

| Table Header | Treatment description |
|--------------|-----------------------|
| SAL 50       | Salmeterol 50 BD      |
| FP 250       | FP 250 BD             |
| FP 500       | FP 500 BD             |
| Tio          | Tiotropium            |

## 2. GENERAL CONSIDERATIONS FOR DATA ANALYSES

All programming will be performed in a HARP environment using SAS Version 9.1.3 or a later release.

### Multicentre Studies

Neither centre nor geographical region will be included in the analysis models.

### Multiple Comparisons and Multiplicity

This is a post-hoc analysis and no adjustments will be made for multiple testing.

## DATA HANDLING CONVENTIONS

### Subgroup and covariate definitions

#### Blood eosinophils

Two definitions will be applied:

- Percentage (2 categories):  $<2\%$ ,  $\geq 2\%$
- Absolute (4 categories):  $<100/\text{mm}^3$ ,  $100/\text{mm}^3$ - $<200/\text{mm}^3$ ,  $200/\text{mm}^3$ - $<300/\text{mm}^3$ ,  $\geq 300/\text{mm}^3$  (depending on subgroup size some categories may be amalgamated for analysis). If the majority of subjects fall into one of these categories then an alternative categorization with intermediate cut points may be considered.

In addition, exploratory analyses will be performed with absolute eosinophils on a continuous scale.

#### Other covariates

The analyses described in Section 9 will use the following covariates:

- FEV<sub>1</sub> analyses: age, sex, baseline FEV<sub>1</sub>
- SGRQ total score analyses: age, sex and baseline SGRQ total score
- Exacerbation analyses: sex, baseline %predicted FEV<sub>1</sub> and frequency of prior exacerbations (0, 1, 2+ where captured)

## EFFICACY ANALYSES

Each study will be analysed separately.

### Time to First Moderate or Severe Exacerbation

The following analysis will be performed for each study where exacerbations were included as an efficacy measure or where moderate and severe exacerbations were both recorded as a safety endpoint. In many studies only exacerbations meeting the definition of serious were captured as an Adverse Event unless exacerbations were explicitly defined as an efficacy endpoint. These studies will not be included due to the low numbers of only severe exacerbations.

It should be noted that selecting COPD exacerbations based on Adverse Event recording may be incomplete. This is because the verbatim text recorded by the investigator may code to an alternative preferred term (e.g. bronchitis, dyspnoea, upper respiratory tract infection, lower respiratory tract infection, cough, infective exacerbation of chronic obstructive airways disease) rather than the preferred term of “Chronic obstructive pulmonary disease”. Analyses of exacerbation data reported as adverse events rather than as a specific efficacy endpoint should therefore be considered in the light of these limitations.

Separate analyses will be performed for each of the two eosinophil subgroups defined in Section 8.

The proportion of subjects experiencing an on-treatment moderate or severe exacerbation will be tabulated by treatment group and eosinophil subgroup level.

The analysis of time to first moderate or severe exacerbation will be performed using a Cox’s proportional hazards model. The model will include covariates for treatment group, sex, %predicted FEV<sub>1</sub> at baseline, frequency of prior exacerbations (where recorded) and eosinophil subgroup. Hazard ratios for the comparisons defined in Section 6.1 will be presented together with associated p-values and 95% CIs. Forest plots will be produced to present results from each individual study on one display.

In addition, Kaplan-Meier survivor functions will be obtained for each level of the eosinophil sub-group using PROC LIFETEST with a TIME statement.

The analysis will be repeated including a term for eosinophil subgroup by treatment interaction. Hazard ratios for the treatment comparisons defined in Section 6.2 will be presented for each level of the eosinophil subgroup together with associated p-values and 95% CIs. Forest plots will be produced to present results from each individual study on one display.

Kaplan-Meier functions will be obtained for each treatment and each level of the eosinophil subgroup.

## Rate of Moderate and Severe Exacerbations

The following analysis will be performed for each study where rate of moderate or severe exacerbations was included as an efficacy endpoint.

Separate analyses will be performed for each of the two eosinophil subgroups defined in Section 8.

The annual rate of moderate and severe exacerbations will be analysed using a generalized linear model, assuming the negative binomial distribution. The response variable will be the number of recorded, on-treatment, moderate and severe exacerbations experienced per subject. The explanatory variables will be treatment group, sex, % predicted FEV<sub>1</sub> at baseline, frequency of prior exacerbations (where recorded) and eosinophil subgroup. The model will also include the logarithm of time on treatment per subject (derived from exposure start and stop) as an offset variable. From this model, point estimates and 95% CIs for the difference in exacerbation rates for the comparisons in Section 6.1 will be obtained.

Forest plots will be produced to present results from each individual study on one display.

The analysis will be repeated including a term for treatment by eosinophil subgroup interaction. From this model, point estimates and 95% CIs for treatment differences for each level of the subgroup will be obtained. Forest plots will be produced to present results from each individual study on one display.

## FEV<sub>1</sub>

The following analysis will be performed for each study. The analysis will use trough FEV<sub>1</sub> if recorded or alternatively post-bronchodilator FEV<sub>1</sub> or alternatively post-dose FEV<sub>1</sub>.

Separate analyses will be performed for each of the two eosinophil subgroups defined in Section 8.

Analysis will be performed using mixed models repeated measures (MMRM) and will include covariates of age, sex, baseline FEV<sub>1</sub>, treatment group, eosinophil subgroup, Day, Day by baseline interaction, Day by eosinophil subgroup interaction and Day by treatment interaction, where Day is nominal (and is therefore equivalent to fitting Visit). Missing data are not directly imputed in this analysis. From this model, point estimates and 95% CIs for the difference in trough FEV<sub>1</sub> for the comparisons in Section 6.1 will be obtained for each Day. Forest plots will be produced to present results from each individual study on one display.

Plots of LSmeans over time by each level of the subgroup will be produced.

The analysis will be repeated including a term for day by treatment group by eosinophil subgroup interaction. From this model, point estimates and 95% CIs for treatment differences for each level of the subgroup on each day will be obtained. Forest plots will be produced to present results from each individual study on one display.

Plots of LSmeans over time by treatment group for each level of the subgroup will be produced.

## **Rate of Decline in FEV<sub>1</sub> - Random Coefficients Model**

This analysis will only be conducted for studies of at least two years duration and will be performed for each study separately.

Separate analyses will be performed for each of the two eosinophil subgroups defined in Section 8.

In this analysis, time will be treated as a continuous variable, and is defined as the number of days which have elapsed since the start of treatment.

The rate of decline in FEV<sub>1</sub> over time will be investigated using a random coefficients model. FEV<sub>1</sub> will be fitted as the response variable. Fixed effects will include age, sex, baseline FEV<sub>1</sub>, treatment group, eosinophil subgroup and time. Subject effects will be assumed to be random. The eosinophil by time interaction will permit point estimates and 95% CIs for slope differences between each level of the subgroup to be obtained. Forest plots will be produced to present results from each individual study on one display. The random coefficients model allows random variation between slopes of individual subjects, as well as intercepts of individual subjects.

Further models will be used to investigate the rate of decline for each level of the eosinophil subgroup by fitting separate random coefficients models for each level. FEV<sub>1</sub> will be fitted as the response variable. Fixed effects will include age, sex, baseline FEV<sub>1</sub>, treatment group and time. Subject effects will be assumed to be random. The treatment group by time interaction will permit point estimates and 95% CIs for slope differences between treatments for each level of the subgroup to be obtained. Forest plots will be produced to present results from each individual study on one display.

## **Rate of Decline in FEV<sub>1</sub> - Individual Regression Slopes**

This analysis will only be conducted for studies of at least two years duration and will be performed for each study separately.

Separate analyses will be performed for each of the two eosinophil subgroups defined in Section 8.

A supportive analysis for rate of decline in FEV<sub>1</sub> will also be performed, where a slope of decline in FEV<sub>1</sub> is calculated for each individual subject by fitting a regression line for FEV<sub>1</sub> over visits recorded.

These values will then be analysed using analysis of covariance, with terms for age, sex, baseline FEV<sub>1</sub> analysis, treatment group and eosinophil subgroup. From this model, point estimates and 95% CIs for the difference in rate of decline for the comparisons defined in Section 6.1 will be obtained. Forest plots will be produced to present results from each individual study on one display.

This analysis will be repeated including a treatment by eosinophil subgroup interaction. From this model, point estimates and 95% CIs for treatment differences for each level of the



subgroup will be obtained. Forest plots will be produced to present results from each individual study on one display.

## **SGRQ**

Analysis of SGRQ will only be performed if consistent trends are seen for the exacerbation and FEV<sub>1</sub> analyses.

The analysis will be performed for each study where SGRQ was included as an endpoint.

Separate analyses will be performed for each of the two eosinophil subgroups defined in Section 8.

The analysis will use the same methodology as described for FEV<sub>1</sub> in Section 9.3.

## **REFERENCES**

GlaxoSmithKline Document Number RM2009/00009/01 Protocol: HZC102970, a 52-week efficacy and safety study to compare the effect of three dosage strengths of fluticasone furoate/GW642444 inhalation powder with GW642444M on the annual rate of exacerbations in subjects with chronic obstructive pulmonary disease. 2010

GlaxoSmithKline Document Number RM2009/00237/01 Protocol: HZC102871, a 52-week efficacy and safety study to compare the effect of three dosage strengths of fluticasone furoate/GW642444 inhalation powder with GW642444M on the annual rate of exacerbations in subjects with chronic obstructive pulmonary disease. 2010

Jansen DF, Schouten JP, Vonk JM, Rijcken B, Timens W, Kraan J, Weiss ST, Postma DS. Smoking and airway hyperresponsiveness especially in the presence of blood eosinophilia increase the risk to develop respiratory symptoms: a 25-year follow-up study in the general adult population. *Am J Respir Crit Care Med* 1999;160: 259–264.

Petsky HL, Cates CJ, Lasserson TJ, Li AM, Turner C, Kynaston JA, Chang AB. A systematic review and meta-analysis: tailoring asthma treatment on eosinophilic markers (exhaled nitric oxide or sputum eosinophils) *Thorax* 2012; 67: 199-208.

### 3. APPENDIX

#### Appendix 1: Seretide COPD studies not included in analysis

| Study     | SFC Dose | Comparators             | Duration | Reason for exclusion                                                  |
|-----------|----------|-------------------------|----------|-----------------------------------------------------------------------|
| SCO30008  | 50/500   | Tiotropium              | 3 weeks  | Duration < 24 weeks                                                   |
| SCO40030  | 50/250   | Placebo, Salmeterol     | 8 weeks  | Duration < 24 weeks                                                   |
| SCO40011  | 50/250   | Ipratropium/Albuterol   | 8 weeks  | Duration < 24 weeks                                                   |
| SCO40012  | 50/250   | Ipratropium/Albuterol   | 8 weeks  | Duration < 24 weeks                                                   |
| SCO100646 | 50/250   | Salmeterol              | 16 weeks | Switch study design so subjects not on SFC for whole treatment period |
| SCO100648 | 50/500   | Open label              | 52 weeks | Open label                                                            |
| SCO101717 | 50/500   | Open label              | 12 weeks | Open label                                                            |
| SCO40055  | 50/250   | FP                      | 52 weeks | Only contains steroid treatment arms                                  |
| SCO30005  | 50/500   | Placebo                 | 13 weeks | Duration < 24 weeks                                                   |
| SCO40034  | 50/500   | Tiotropium              | 12 weeks | Duration < 24 weeks                                                   |
| SCO104925 | 50/500   | Placebo, Salmeterol, FP | 12 weeks | Duration < 24 weeks                                                   |
| ADC112355 | 50/250   | Placebo                 | 16 weeks | Duration < 24 weeks                                                   |
| ASQ112989 | 50/250   | Placebo, Salmeterol     | 6 weeks  | Duration < 24 weeks                                                   |

## Eosinophil Analysis Plan: Deviations from Plan

---

### SCOPE

The analysis plan covered studies of FP as monotherapy as well as studies of FP in combination with salmeterol. The analyses described in this paper refer only to those studies with FP in combination with salmeterol.

# CLARIFICATIONS TO/DEviations FROM PLAN

## **Absolute eosinophil subgroup**

Prior to performing any analysis and based on the distribution of absolute eosinophil levels in these studies, the decision was made to analyse as 2 categories  $<200/\text{mm}^3$  and  $\geq 200/\text{mm}^3$  rather than 4 categories as detailed in the RAP. The exploratory analyses of absolute eosinophils as a continuous variable were not performed.

## **SCO100540**

The decision was made to exclude study SCO100540 from the analyses as eosinophils were only collected in a subset of subjects.

## **Annual Rate of Moderate and Severe Exacerbations**

The annual rate of moderate and severe exacerbations analyses have only been performed for the three studies of at least 1 year duration (SFCB3024, SCO40036, SCO30002).

Two of these studies recorded prior history of exacerbation and two did not. Hence, in addition to what was specified in the analysis plan, analyses of this endpoint for SCO40036 and SCO30002 were repeated excluding prior history of exacerbation as a covariate for consistency with the one-year studies where this was not recorded.
